# Supplementary material
Source: PubMed Central journal article supplement (PMC9253060)
Supplement: 41422_2022_673_MOESM2_ESM.pdf [file 41422_2022_673_MOESM2_ESM.pdf]

Figure S2

a

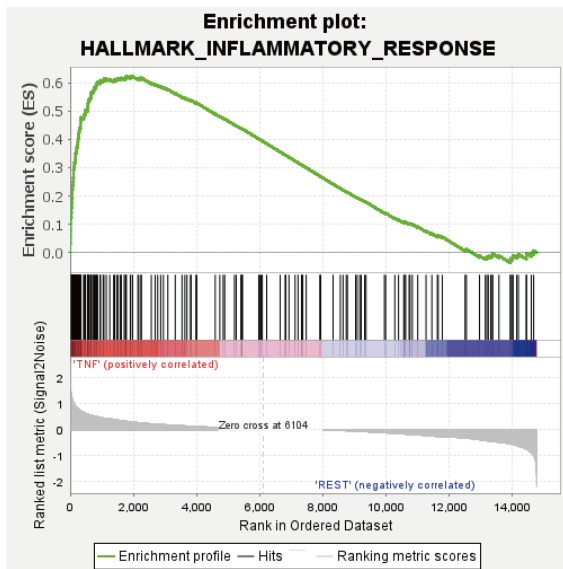

b

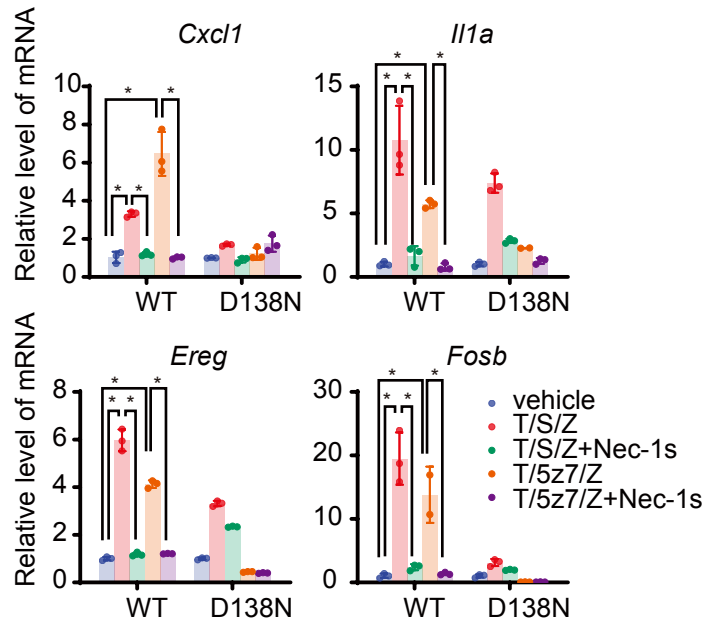

c

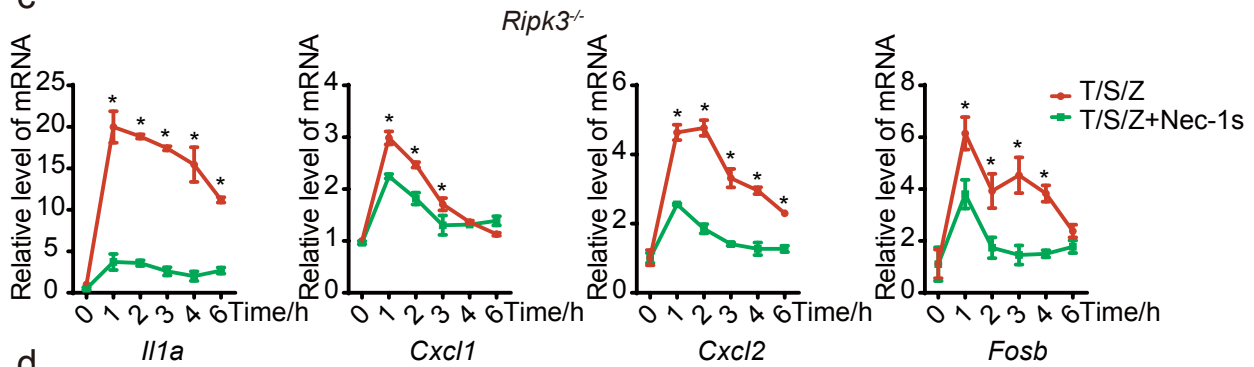

d

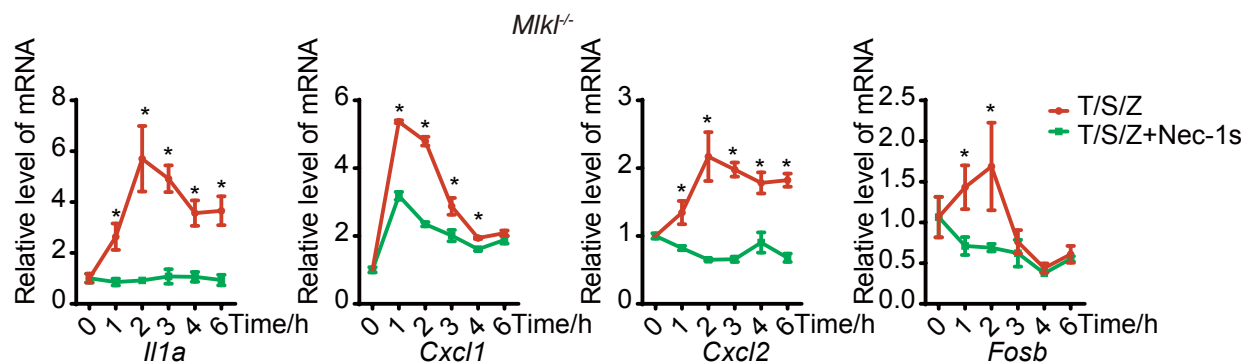

# Figure S2

e

*Ripk1<sup>D325A/D325A</sup>; Ripk3<sup>-/-</sup>*

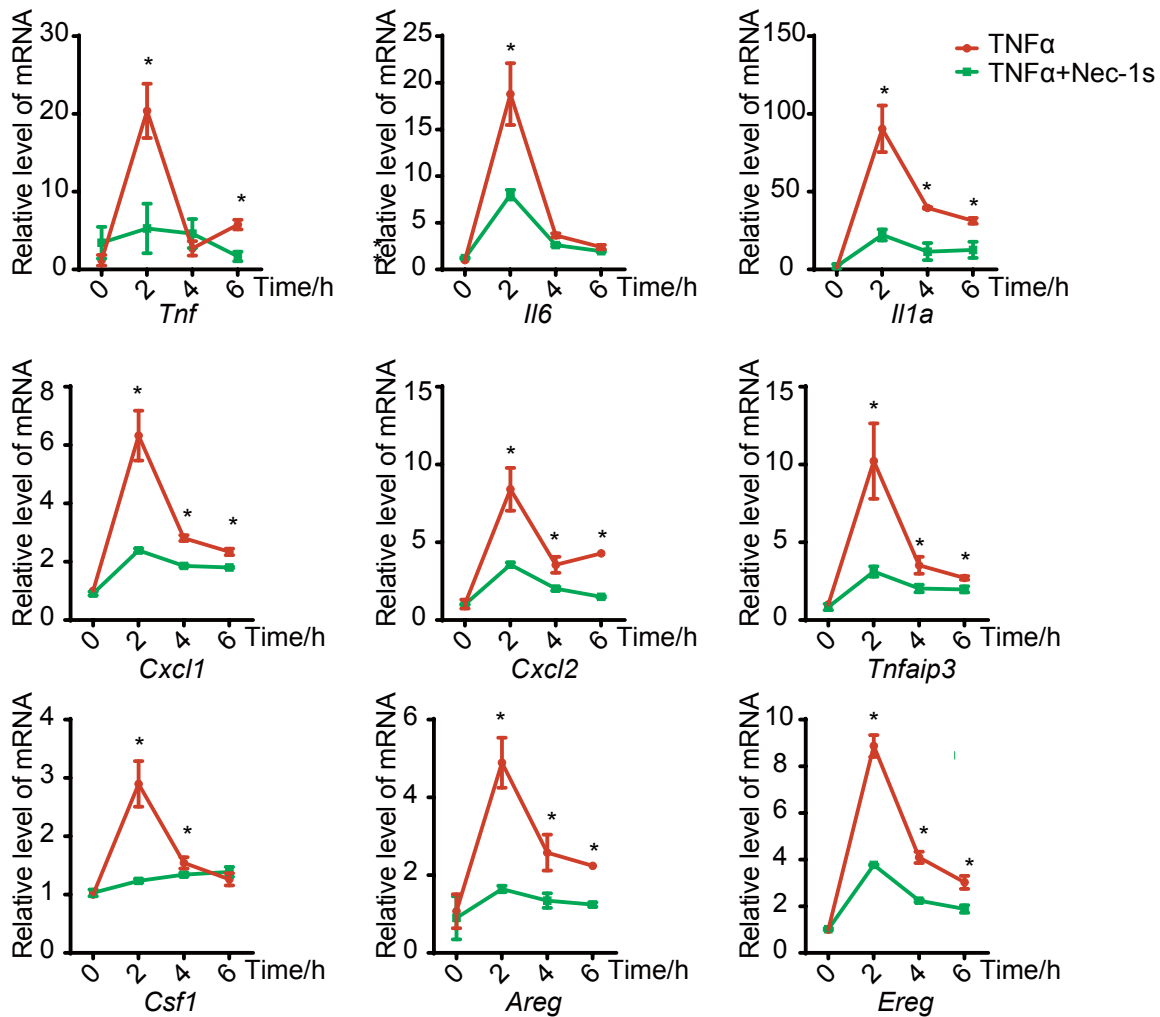

**Fig. S2 RIPK1 regulates gene transcription in a cell death independent manner.** **a** Inflammatory response pathway analysis was shown by GSEA enrichment plot of RNA-seq data with the genes significantly enriched in *Ripk1<sup>D325A/D325A</sup>;Ripk3<sup>-/-</sup>* MEFs treated with TNFα compared with vehicle or TNFα plus Nec-1s. **b** qPCR verification of the expression of indicated genes from the RNA-Seq results in Wildtype or *Ripk1<sup>D138N/D138N</sup>* MEFs with indicated treatment. 5 ng/ml mTNFα, 50 μM SM164, 100 nM (5Z)-7-oxozeaeno, 20 μM zVAD-fmk, 10 μM Nec-1s were used. mTNFα was added 0.5h after pretreatment with other compounds and treated for 3h (n = 3, mean ± SD). \*p < 0.01. **c, d** qPCR analyses of the expression of indicated genes in *Ripk3<sup>-/-</sup>* (c), *Mlkl<sup>-/-</sup>* (d), MEFs treated with vehicle, or 50 μM SM164, 20 μM zVAD-fmk, +/- 10 μM Nec-1s for 0.5h followed by 5 ng/ml mTNFα for the indicated time course (n = 3, mean ± SD). \*p < 0.05. **e** qPCR analyses of the expression of indicated genes in *Ripk1<sup>D325A/D325A</sup>;Ripk3<sup>-/-</sup>* MEFs treated with vehicle, or +/- 10 μM Nec-1s for 0.5h followed by 20 ng/ml mTNFα for the indicated time course (n = 3, mean ± SD), \*p < 0.05.
