# Supplementary material
Source: PubMed Central journal article supplement (PMC9253060)
Supplement: 41422_2022_673_MOESM3_ESM.pdf [file 41422_2022_673_MOESM3_ESM.pdf]

# Figure S3

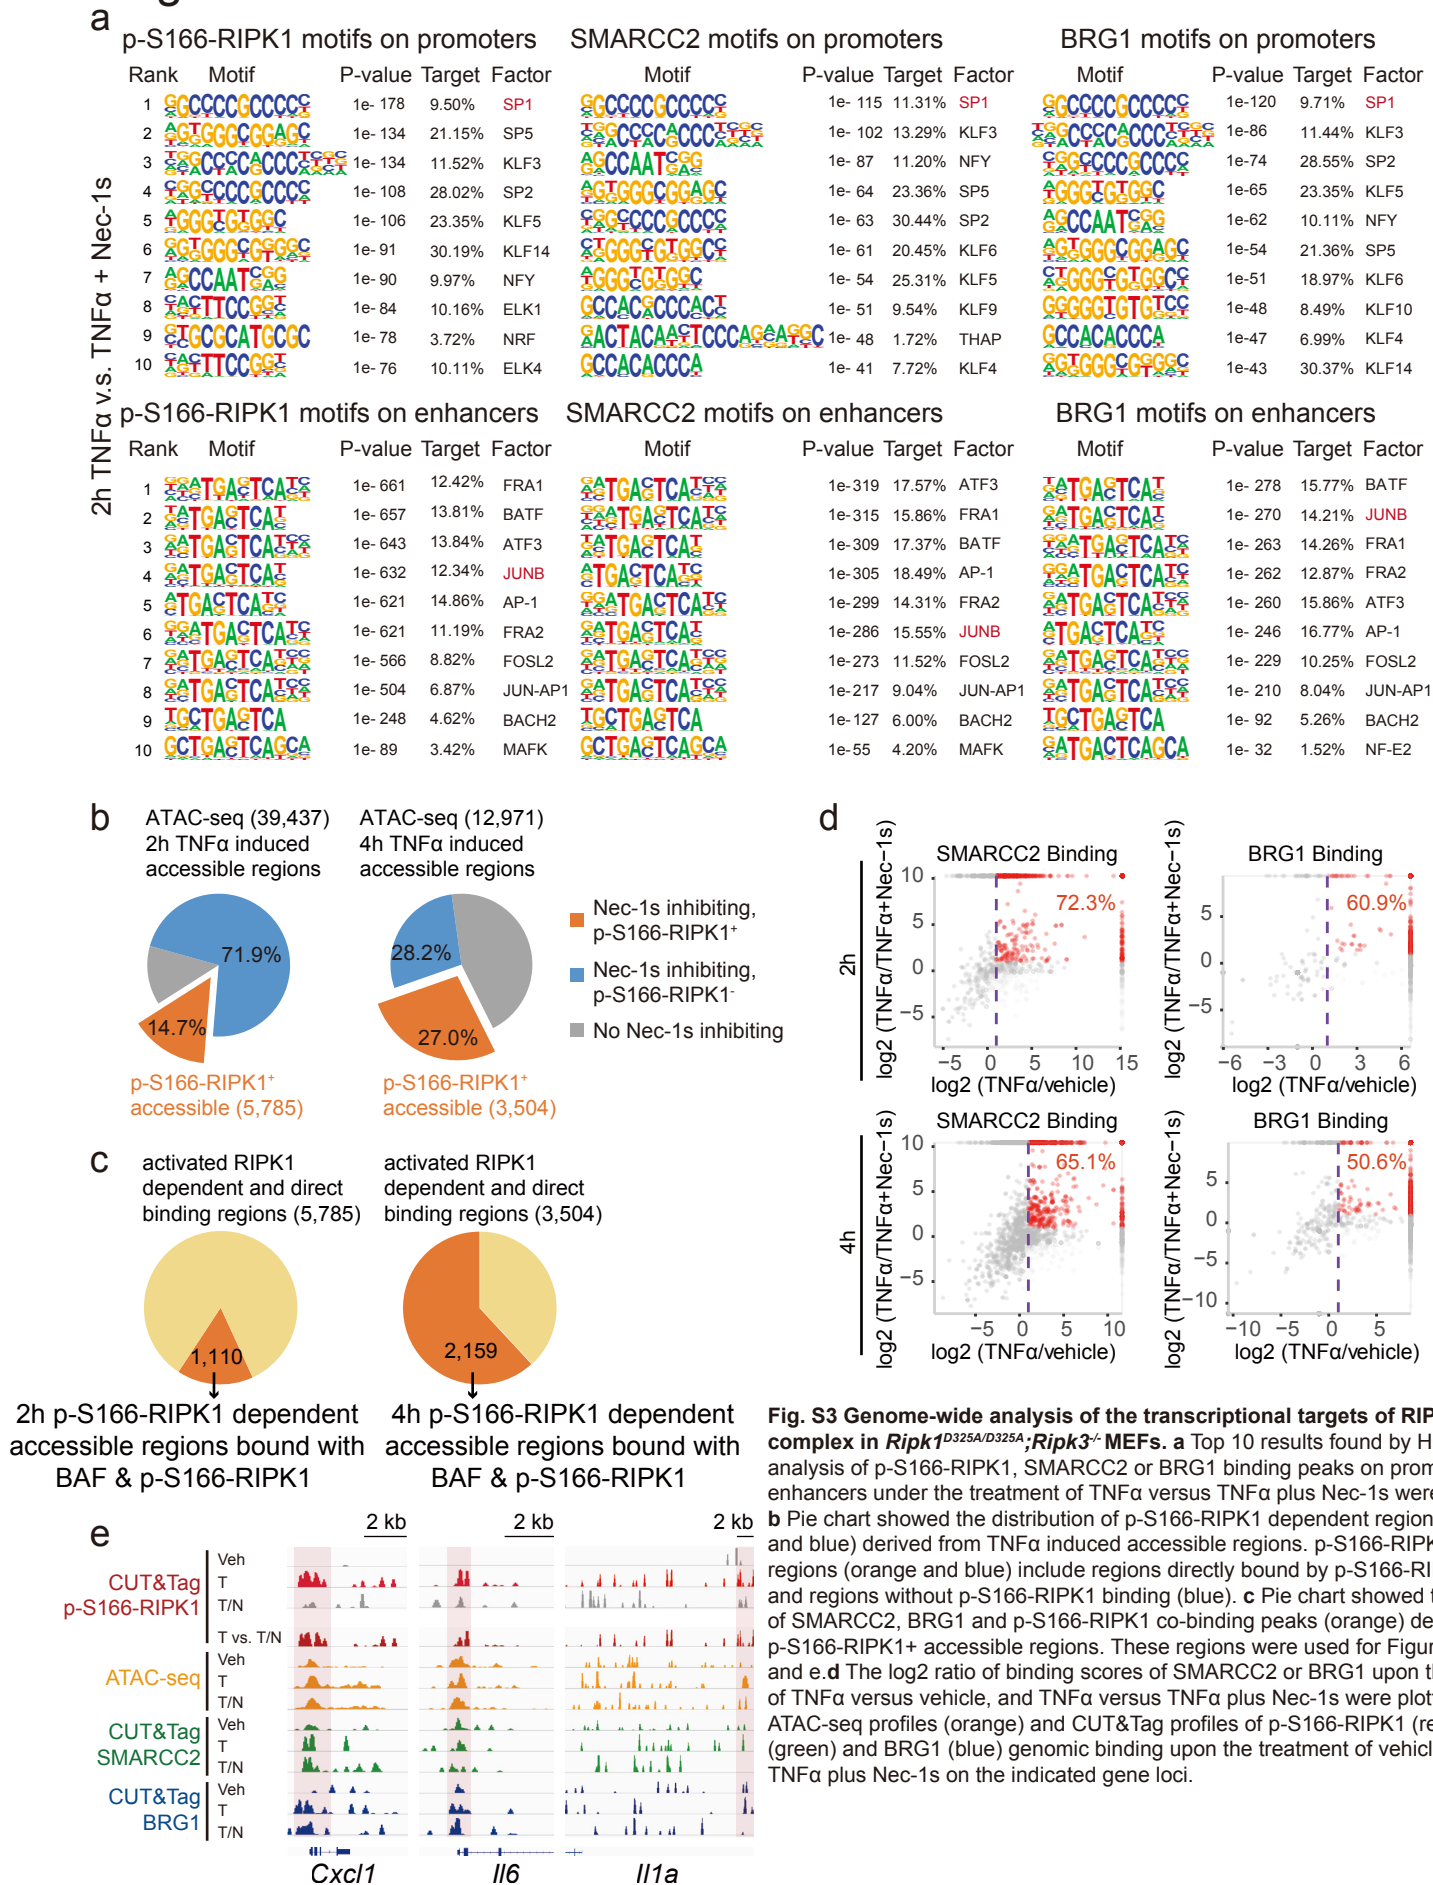

**Fig. S3 Genome-wide analysis of the transcriptional targets of RIPK1 and BAF complex in *Ripk1<sup>D325A/D325A</sup>;Ripk3<sup>-/-</sup>* MEFs.** **a** Top 10 results found by HOMER motif analysis of p-S166-RIPK1, SMARCC2 or BRG1 binding peaks on promoters or enhancers under the treatment of TNFα versus TNFα plus Nec-1s were shown. **b** Pie chart showed the distribution of p-S166-RIPK1 dependent regions (orange and blue) derived from TNFα induced accessible regions. p-S166-RIPK1 dependent regions (orange and blue) include regions directly bound by p-S166-RIPK1 (orange) and regions without p-S166-RIPK1 binding (blue). **c** Pie chart showed the distribution of SMARCC2, BRG1 and p-S166-RIPK1 co-binding peaks (orange) derived from p-S166-RIPK1<sup>+</sup> accessible regions. These regions were used for Figure 3, c, d and e. **d** The log<sub>2</sub> ratio of binding scores of SMARCC2 or BRG1 upon the treatment of TNFα versus vehicle, and TNFα versus TNFα plus Nec-1s were plotted. **e** The ATAC-seq profiles (orange) and CUT&Tag profiles of p-S166-RIPK1 (red), SMARCC2 (green) and BRG1 (blue) genomic binding upon the treatment of vehicle, TNFα and TNFα plus Nec-1s on the indicated gene loci.
