# Supplementary material
Source: PubMed Central journal article supplement (PMC9253060)
Supplement: 41422_2022_673_MOESM4_ESM.pdf [file 41422_2022_673_MOESM4_ESM.pdf]

# Figure S4

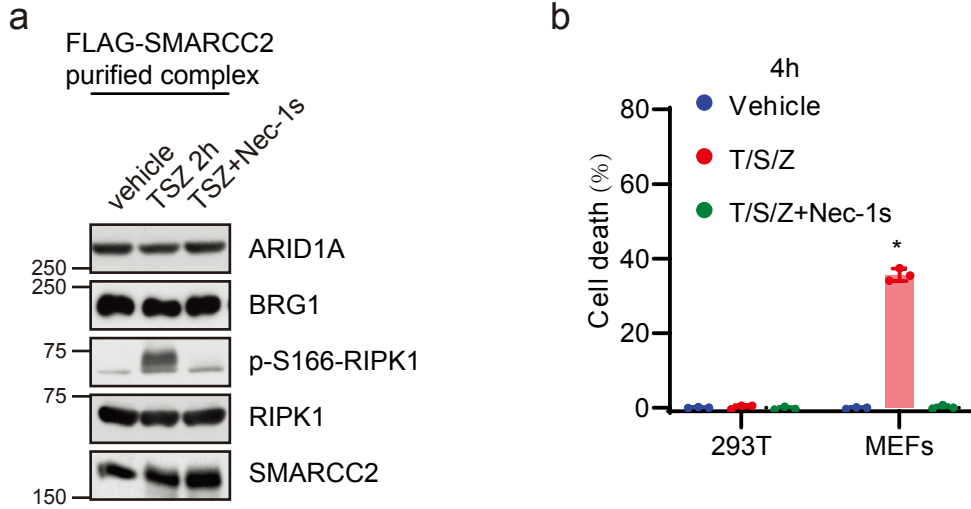

**Fig. S4 Purification of mSWI/SNF complex from 293T cells.** **a** 293T cells were infected by FLAG-SMARCC2 lentivirus, treated under indicated conditions following by FLAG IP to purify mSWI/SNF complexes together with activated/inactivated RIPK1. The purified complexes were analyzed by western blotting with the indicated antibodies. **b** 293T cells and MEFs were treated under indicated conditions for 4h and cell death was measured by SytoxGreen positivity.
