# Supplementary material
Source: PubMed Central journal article supplement (PMC9253060)
Supplement: 41422_2022_673_MOESM5_ESM.pdf [file 41422_2022_673_MOESM5_ESM.pdf]

# Figure S5

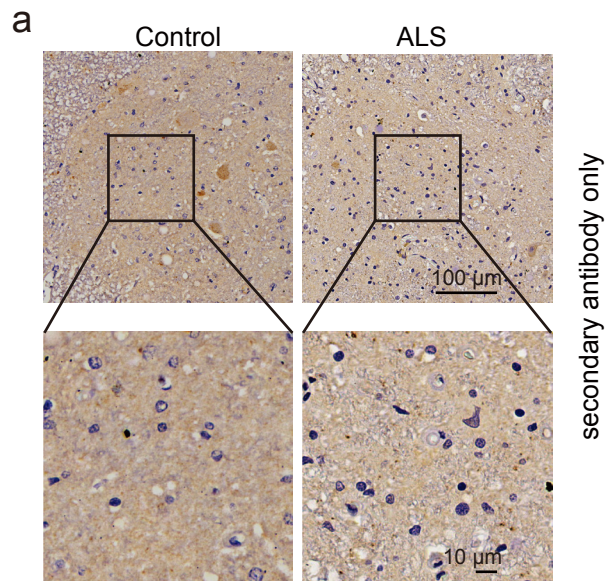

**Fig. S5 Specificity control of immunohistochemistry staining.** a Immunohistochemistry staining of upper spinal cord sections from human patients with ALS and the age-relevant control. Staining images of secondary antibody only in ventral horn are shown.
