# Supplementary material
Source: PubMed Central journal article supplement (PMC9253060)
Supplement: 41422_2022_673_MOESM6_ESM.pdf [file 41422_2022_673_MOESM6_ESM.pdf]

**Table S1 Transcription factors and co-regulators detected in nuclear RIPK1 interactome.**

| Gene names | Intensity DMSO | Intensity TSZ1h | Intensity TSZ+Nec-1s | log2 TSZ/veh | log2 TSZ/T SZ + Nec-1s | (co-) activators | (co-) repressors | TSZ inducible (TSZ/veh > 2) |
|------------|----------------|-----------------|----------------------|--------------|------------------------|------------------|------------------|-----------------------------|
| Rela       | 0.00E+00       | 5.82E+07        | 2.43E+06             | inf          | 4.6                    | TRUE             | TRUE             | TRUE                        |
| Sp1        | 0.00E+00       | 1.51E+07        | 4.08E+06             | inf          | 1.9                    | TRUE             | FALSE            | TRUE                        |
| Nfib       | 0.00E+00       | 8.75E+06        | 0.00E+00             | inf          | inf                    | TRUE             | FALSE            | TRUE                        |
| Junb       | 1.59E+07       | 8.44E+07        | 3.48E+06             | 2.4          | 4.6                    | TRUE             | FALSE            | TRUE                        |
| Mafg       | 4.92E+06       | 2.14E+07        | 0.00E+00             | 2.1          | inf                    | TRUE             | FALSE            | TRUE                        |
| Ebf3       | 3.48E+06       | 1.09E+07        | 0.00E+00             | 1.6          | inf                    | TRUE             | FALSE            | TRUE                        |
| Ebf1       | 3.48E+06       | 1.09E+07        | 0.00E+00             | 1.6          | inf                    | TRUE             | FALSE            | TRUE                        |
| Ebf4       | 3.48E+06       | 1.09E+07        | 0.00E+00             | 1.6          | inf                    | TRUE             | FALSE            | TRUE                        |
| Parp1      | 2.28E+08       | 1.78E+08        | 6.82E+07             | -0.4         | 1.4                    | TRUE             | FALSE            | FALSE                       |
| Hmga2      | 1.78E+07       | 1.15E+07        | 6.58E+06             | -0.6         | 0.8                    | TRUE             | FALSE            | FALSE                       |
| Ybx1       | 2.47E+09       | 1.59E+09        | 6.88E+08             | -0.6         | 1.2                    | TRUE             | FALSE            | FALSE                       |
| Rbpj       | 3.81E+07       | 2.35E+07        | 1.45E+07             | -0.7         | 0.7                    | TRUE             | FALSE            | FALSE                       |
| Nfix       | 1.03E+08       | 6.11E+07        | 1.37E+07             | -0.8         | 2.2                    | TRUE             | FALSE            | FALSE                       |
| Preb       | 3.59E+07       | 2.10E+07        | 3.10E+06             | -0.8         | 2.8                    | TRUE             | FALSE            | FALSE                       |
| Hnmpk      | 1.10E+10       | 6.16E+09        | 3.56E+09             | -0.8         | 0.8                    | TRUE             | FALSE            | FALSE                       |
| Nfic       | 4.08E+08       | 2.06E+08        | 5.83E+07             | -1.0         | 1.8                    | TRUE             | FALSE            | FALSE                       |
| Tead1      | 7.98E+06       | 3.72E+06        | 3.72E+06             | -1.1         | 0.0                    | TRUE             | FALSE            | FALSE                       |
| Tead4      | 7.98E+06       | 3.72E+06        | 3.72E+06             | -1.1         | 0.0                    | TRUE             | FALSE            | FALSE                       |
| Atf1       | 1.83E+07       | 8.35E+06        | 2.44E+06             | -1.1         | 1.8                    | TRUE             | FALSE            | FALSE                       |
| Creb1      | 1.83E+07       | 8.35E+06        | 2.44E+06             | -1.1         | 1.8                    | TRUE             | FALSE            | FALSE                       |
| Cdc5l      | 6.53E+08       | 2.77E+08        | 9.54E+07             | -1.2         | 1.5                    | TRUE             | FALSE            | FALSE                       |
| Stag2      | 9.73E+07       | 4.01E+07        | 2.01E+07             | -1.3         | 1.0                    | TRUE             | FALSE            | FALSE                       |
| Crebbp     | 8.76E+07       | 2.64E+07        | 1.03E+07             | -1.7         | 1.4                    | TRUE             | FALSE            | FALSE                       |
| Six1       | 7.84E+06       | 0.00E+00        | 1.02E+06             | -inf         | -inf                   | TRUE             | FALSE            | FALSE                       |
| Six2       | 7.84E+06       | 0.00E+00        | 1.02E+06             | -inf         | -inf                   | TRUE             | FALSE            | FALSE                       |
| Lrrfip1    | 1.60E+07       | 2.62E+07        | 0.00E+00             | 0.7          | inf                    | FALSE            | TRUE             | FALSE                       |
| Eno1       | 1.09E+08       | 1.40E+08        | 1.81E+07             | 0.4          | 2.9                    | FALSE            | TRUE             | FALSE                       |
| Phf6       | 9.25E+07       | 6.46E+07        | 2.38E+06             | -0.5         | 4.8                    | FALSE            | TRUE             | FALSE                       |
| Thap11     | 4.16E+07       | 2.89E+07        | 5.88E+06             | -0.5         | 2.3                    | FALSE            | TRUE             | FALSE                       |
| Cc2d1a     | 1.57E+08       | 1.09E+08        | 6.15E+06             | -0.5         | 4.1                    | FALSE            | TRUE             | FALSE                       |
| Purb       | 1.37E+08       | 8.55E+07        | 3.65E+07             | -0.7         | 1.2                    | FALSE            | TRUE             | FALSE                       |
| Ybx3       | 9.35E+07       | 5.76E+07        | 3.51E+07             | -0.7         | 0.7                    | FALSE            | TRUE             | FALSE                       |
| Pura       | 1.64E+08       | 9.84E+07        | 3.25E+07             | -0.7         | 1.6                    | FALSE            | TRUE             | FALSE                       |
| Cggbp1     | 2.13E+08       | 1.26E+08        | 5.64E+07             | -0.8         | 1.2                    | FALSE            | TRUE             | FALSE                       |
| Myef2      | 6.69E+08       | 3.89E+08        | 1.30E+08             | -0.8         | 1.6                    | FALSE            | TRUE             | FALSE                       |
| Chchd3     | 3.66E+09       | 2.12E+09        | 7.54E+08             | -0.8         | 1.5                    | FALSE            | TRUE             | FALSE                       |
| Kcnip3     | 7.04E+07       | 3.22E+07        | 0.00E+00             | -1.1         | inf                    | FALSE            | TRUE             | FALSE                       |
| Samp       | 7.22E+07       | 1.66E+07        | 9.20E+06             | -2.1         | 0.9                    | FALSE            | TRUE             | FALSE                       |
| Klfl6      | 2.71E+06       | 0.00E+00        | 0.00E+00             | -inf         | 0.0                    | FALSE            | TRUE             | FALSE                       |
| Zc3h8      | 5.92E+06       | 0.00E+00        | 0.00E+00             | -inf         | 0.0                    | FALSE            | TRUE             | FALSE                       |
