# Supplementary material
Source: PubMed Central journal article supplement (PMC9253060)
Supplement: 41422_2022_673_MOESM7_ESM.pdf [file 41422_2022_673_MOESM7_ESM.pdf]

**Table S2 Intersected target genes detected in Ripk1D325A/D325A;Ripk3<sup>-/-</sup> MEFs by RNA-seq, CUT&Tag and ATAC-seq.**

| <b>Overlapped target genes detected from RNA-seq, CUT&amp;Tag and ATAC-seq</b> |
|--------------------------------------------------------------------------------|
| Csf3                                                                           |
| Tnfaip3                                                                        |
| Cxcl2                                                                          |
| Cxcl1                                                                          |
| Zfp36                                                                          |
| Adora2b                                                                        |
| Pde10a                                                                         |
| Ereg                                                                           |
| Naa16                                                                          |
| Gm12191                                                                        |
| Ier3ip1                                                                        |
| Map3k5                                                                         |
| Areg                                                                           |
| Errfi1                                                                         |
| Catip                                                                          |
| Mrc1                                                                           |
| Slco1a5                                                                        |
| Ill1a                                                                          |
| Txndc5                                                                         |
| Tmem151a                                                                       |
| Ptges                                                                          |
| Ptgs2                                                                          |
| Rrp8                                                                           |
| Nhs12                                                                          |
| Ido2                                                                           |
| Rps27                                                                          |
| Hcar2                                                                          |
| Il6                                                                            |
| Artn                                                                           |
| Cxcl3                                                                          |
| D130043K22Rik                                                                  |
| Pkn3                                                                           |
| Trdmt1                                                                         |
| Nr5a2                                                                          |
| Csf2                                                                           |
| Ier3                                                                           |
| Coro1a                                                                         |
| Tnfsf11                                                                        |
| Traf1                                                                          |
| Sorbs2                                                                         |
| Tecr                                                                           |

|         |
|---------|
| Tmem140 |
|---------|

|       |
|-------|
| Nlrp3 |
|-------|
