# Supplementary material
Source: PubMed Central journal article supplement (PMC9253060)
Supplement: 41422_2022_673_MOESM8_ESM.pdf [file 41422_2022_673_MOESM8_ESM.pdf]

**Table S3 p-S166-RIPK1 dependent nuclear protein phosphorylation induced by T/S/Z.**

| Gene names | Localization probability | Positions within proteins | Amino acid | AVG_TSZ/veh | AVG_TSZ/TSZ + Nec-1s | TSZ inducible | RIPK1 kinase dependent |
|------------|--------------------------|---------------------------|------------|-------------|----------------------|---------------|------------------------|
| Dync1li1   | 0.93                     | 515                       | T          | 4.15        | 1.78                 | TRUE          | TRUE                   |
| Nes        | 1.00                     | 894                       | S          | 4.03        | 1.96                 | TRUE          | TRUE                   |
| Dync1li1   | 0.62                     | 513                       | T          | 4.03        | 1.92                 | TRUE          | TRUE                   |
| Vim        | 0.76                     | 8                         | S          | 3.84        | 2.75                 | TRUE          | TRUE                   |
| Nes        | 1.00                     | 883                       | S          | 3.77        | 1.88                 | TRUE          | TRUE                   |
| Dync1li1   | 0.53                     | 510                       | S          | 3.76        | 1.76                 | TRUE          | TRUE                   |
| Dync1li1   | 0.57                     | 518                       | T          | 3.76        | 1.76                 | TRUE          | TRUE                   |
| Nes        | 1.00                     | 886                       | S          | 3.71        | 1.49                 | TRUE          | TRUE                   |
| Dync1li1   | 0.69                     | 512                       | T          | 3.45        | 1.58                 | TRUE          | TRUE                   |
| Nfic       | 0.76                     | 273                       | S          | 3.28        | 1.70                 | TRUE          | TRUE                   |
| Nfic       | 0.80                     | 275                       | S          | 3.28        | 1.70                 | TRUE          | TRUE                   |
| Nfic       | 0.76                     | 276                       | S          | 3.28        | 1.70                 | TRUE          | TRUE                   |
| Dync1li1   | 0.70                     | 516                       | S          | 2.85        | 1.54                 | TRUE          | TRUE                   |
| Nes        | 1.00                     | 731                       | S          | 2.10        | 1.43                 | TRUE          | TRUE                   |
| Lmna       | 1.00                     | 406                       | S          | 1.96        | 1.44                 | TRUE          | TRUE                   |
| Lmna       | 1.00                     | 409                       | S          | 1.95        | 1.47                 | TRUE          | TRUE                   |
| Lmna       | 0.86                     | 414                       | S          | 1.95        | 1.54                 | TRUE          | TRUE                   |
| Lmna       | 1.00                     | 407                       | S          | 1.93        | 1.44                 | TRUE          | TRUE                   |
| Ap3d1      | 0.72                     | 755                       | S          | 1.90        | 1.81                 | TRUE          | TRUE                   |
| Ap3d1      | 0.99                     | 760                       | S          | 1.90        | 1.81                 | TRUE          | TRUE                   |
| Ap3d1      | 0.99                     | 758                       | T          | 1.90        | 1.81                 | TRUE          | TRUE                   |
| Nes        | 1.00                     | 813                       | S          | 1.90        | 1.42                 | TRUE          | TRUE                   |
| Nes        | 1.00                     | 816                       | S          | 1.90        | 1.42                 | TRUE          | TRUE                   |
| Nes        | 1.00                     | 819                       | S          | 1.90        | 1.42                 | TRUE          | TRUE                   |
| Thrap3     | 0.97                     | 240                       | S          | 1.84        | 1.88                 | TRUE          | TRUE                   |
| Lmna       | 0.95                     | 404                       | S          | 1.84        | 1.62                 | TRUE          | TRUE                   |
| Srrm2      | 0.98                     | 1467                      | T          | 1.80        | 1.47                 | TRUE          | TRUE                   |
| Cobll1     | 0.79                     | 896                       | S          | 1.79        | 1.43                 | TRUE          | TRUE                   |
| Srrm2      | 1.00                     | 1475                      | S          | 1.78        | 1.61                 | TRUE          | TRUE                   |
| Srrm2      | 1.00                     | 1477                      | S          | 1.75        | 1.59                 | TRUE          | TRUE                   |
| Srrm2      | 1.00                     | 1478                      | S          | 1.75        | 1.59                 | TRUE          | TRUE                   |
| Plekhg3    | 0.99                     | 1136                      | S          | 1.75        | 1.53                 | TRUE          | TRUE                   |
| Matr3      | 1.00                     | 596                       | S          | 1.74        | 1.48                 | TRUE          | TRUE                   |
| Thrap3     | 1.00                     | 243                       | S          | 1.74        | 1.58                 | TRUE          | TRUE                   |
| Plekhg3    | 1.00                     | 1141                      | S          | 1.70        | 1.46                 | TRUE          | TRUE                   |
| Nfix       | 0.71                     | 267                       | T          | 1.62        | 1.46                 | TRUE          | TRUE                   |
| Nfix       | 0.85                     | 268                       | S          | 1.61        | 1.48                 | TRUE          | TRUE                   |
| Plekhg3    | 0.95                     | 1138                      | S          | 1.60        | 1.40                 | TRUE          | TRUE                   |
| Srrm2      | 1.00                     | 1473                      | S          | 1.60        | 1.46                 | TRUE          | TRUE                   |
| Nfix       | 0.97                     | 265                       | S          | 1.54        | 1.51                 | TRUE          | TRUE                   |

|         |      |      |   |      |      |      |      |
|---------|------|------|---|------|------|------|------|
| Smarcc2 | 0.93 | 306  | S | 1.53 | 1.42 | TRUE | TRUE |
| Srrm2   | 0.98 | 848  | S | 1.53 | 1.47 | TRUE | TRUE |
| Srrm2   | 0.98 | 1453 | S | 1.53 | 1.70 | TRUE | TRUE |
| Srrm2   | 0.75 | 1457 | S | 1.53 | 1.70 | TRUE | TRUE |
| Srrm2   | 0.97 | 1458 | S | 1.53 | 1.70 | TRUE | TRUE |
| Nfix    | 0.70 | 271  | S | 1.48 | 1.52 | TRUE | TRUE |
| Nfib    | 0.86 | 265  | S | 1.48 | 1.43 | TRUE | TRUE |
| G3bp1   | 0.85 | 231  | S | 1.47 | 1.53 | TRUE | TRUE |
| Cobll1  | 0.76 | 897  | S | 1.46 | 1.42 | TRUE | TRUE |
| Nfib    | 0.82 | 262  | S | 1.45 | 1.52 | TRUE | TRUE |
| Tcof1   | 1.00 | 1191 | S | 1.44 | 1.56 | TRUE | TRUE |
| Srrm2   | 0.98 | 1515 | S | 1.42 | 1.44 | TRUE | TRUE |
| Srrm2   | 0.97 | 1518 | S | 1.42 | 1.43 | TRUE | TRUE |
| Lima1   | 0.99 | 367  | S | 1.41 | 1.57 | TRUE | TRUE |
| Lima1   | 0.69 | 371  | S | 1.41 | 1.57 | TRUE | TRUE |
| Srrm2   | 0.97 | 1517 | S | 1.41 | 1.40 | TRUE | TRUE |
