# Supplementary material
Source: PubMed Central journal article supplement (PMC9253060)
Supplement: 41422_2022_673_MOESM9_ESM.pdf [file 41422_2022_673_MOESM9_ESM.pdf]

**Table S4 The information on the pathological human samples used in this study.**

| <b>Patient #</b> | <b>Group</b> | <b>Age</b> | <b>Gender</b> | <b>Assay</b> | <b>Antibodies used</b>         |
|------------------|--------------|------------|---------------|--------------|--------------------------------|
| 88               | Control      | 78         | F             | IHC          | p-S166-RIPK1                   |
| 83               | Control      | 63         | F             | IHC          | p-S166-RIPK1                   |
| 77               | Control      | 72         | M             | IHC          | p-S166-RIPK1                   |
| 125              | ALS          | 67         | M             | IHC          | p-S166-RIPK1                   |
| 116              | ALS          | 72         | M             | IHC          | p-S166-RIPK1                   |
| 111              | ALS          | 59         | F             | IHC          | p-S166-RIPK1                   |
| 110              | ALS          | 53         | M             | IHC          | p-S166-RIPK1                   |
| 109              | ALS          | 49         | M             | IHC          | p-S166-RIPK1                   |
| 107              | ALS          | 74         | M             | IHC          | p-S166-RIPK1                   |
| 104              | ALS          | 74         | M             | IHC          | p-S166-RIPK1                   |
| 1837             | Control      | 68         | M             | IHC          | p-S166-RIPK1                   |
| 1658             | ALS          | 52         | F             | IHC          | p-S166-RIPK1                   |
| 2022             | ALS          | 56         | F             | IHC          | p-S166-RIPK1                   |
| 2297             | ALS          | 47         | F             | IHC          | p-S166-RIPK1                   |
| 2372             | ALS          | 58         | M             | IHC          | p-S166-RIPK1                   |
| 26               | Control      | 38         | M             | IF           | p-S166-RIPK1, Iba1             |
| 40               | Control      |            |               | IF           | p-S166-RIPK1, Iba1             |
| 73               | Control      | 74         | M             | IF           | p-S166-RIPK1, Iba1             |
| 43               | ALS          |            |               | IF           | p-S166-RIPK1, Iba1             |
| 47               | ALS          | 65         | F             | IF           | p-S166-RIPK1, Iba1             |
| 48               | ALS          | 67         | M             | IF           | p-S166-RIPK1, Iba1             |
| 62               | ALS          | 52         | M             | IF           | p-S166-RIPK1, Iba1             |
| 63               | ALS          |            |               | IF           | p-S166-RIPK1, Iba1             |
| 71               | ALS          |            |               | IF           | p-S166-RIPK1, Iba1             |
| 72               | ALS          |            |               | IF           | p-S166-RIPK1, Iba1             |
| 97               | ALS          |            |               | IF           | p-S166-RIPK1, Iba1             |
| 31               | Control      | 67         | M             | CUT&Tag      | p-S166-RIPK1                   |
| 42               | Control      | 61         | M             | CUT&Tag      | p-S166-RIPK1, H3K27Ac, H3K4me1 |
| 70               | Control      |            |               | CUT&Tag      | p-S166-RIPK1, H3K4me1          |
| 73               | Control      | 74         | M             | CUT&Tag      | H3K27Ac                        |
| 30               | ALS          | 73         | M             | CUT&Tag      | p-S166-RIPK1, H3K27Ac, H3K4me1 |
| 32               | ALS          | 71         | M             | CUT&Tag      | p-S166-RIPK1, H3K27Ac, H3K4me1 |
| 36               | ALS          | 73         | M             | CUT&Tag      | p-S166-RIPK1, H3K27Ac, H3K4me1 |
| 38               | ALS          | 74         | F             | CUT&Tag      | p-S166-RIPK1, H3K27Ac          |
