# Supplementary material
Source: PubMed Central journal article supplement (PMC9253060)
Supplement: 41422_2022_673_MOESM10_ESM.pdf [file 41422_2022_673_MOESM10_ESM.pdf]

**Table S5 Intersected target genes detected in spinal cords from ALS human patients and ALS mice models.**

| <b>Overlapped genes in Figure 5F</b> |
|--------------------------------------|
| VIPR1                                |
| IRF7                                 |
| CSF2RB                               |
| CCL8                                 |
| TPM2                                 |
| COL5A1                               |
| BMP1                                 |
| TAGLN2                               |
| GMIP                                 |
| MT1A                                 |
| TNFRSF14                             |
| LCP2                                 |
| CYBA                                 |
| KCNJ11                               |
| ABLIM2                               |
| COLEC11                              |
| PLD4                                 |
| SLAMF9                               |
| MRC2                                 |
| WNT3                                 |
| SARDH                                |
| C3orf18                              |
| CSF3R                                |
| PODXL                                |
| MT1X                                 |
| RASGEF1C                             |
| DENND3                               |
| POMC                                 |
| CKAP2L                               |
| NCF4                                 |
| SH3TC1                               |
| LSM10                                |
| UBA52                                |
| CCL2                                 |
| IL1A                                 |
| LY6H                                 |
| TMPRSS4                              |
| ARHGAP28                             |
| CD14                                 |
| AGPAT2                               |
| EMP1                                 |
| EPHA1                                |

| <b>Overlapped genes in Figure 5G</b> |
|--------------------------------------|
| C1qc                                 |
| Gpr146                               |
| Ptbp1                                |
| Clic1                                |
| C1qa                                 |
| C1qb                                 |
| Spire1                               |
| Man2b2                               |
| Agt                                  |
| Zap70                                |
| Phyhd1                               |
| Nme4                                 |
| Rhbdf1                               |
| Triobp                               |
| Fanci                                |
| Slc1a5                               |
| Angptl2                              |
| E2f2                                 |
| Cd68                                 |
| Ube2l6                               |
| Ankrd54                              |
| Rac2                                 |
| Ebi3                                 |
| Eif4a3                               |
| Ablim2                               |
| Abr                                  |
| Dctn3                                |
| Pycard                               |
| Kcns1                                |
| Sgpl1                                |
| Micall2                              |
| Pou3f4                               |
| Syk                                  |
| Prr13                                |
| Plxnd1                               |
| Arhgap8                              |
| Sorbs1                               |
| Serpinf2                             |
| Polb                                 |
| Ly6g6e                               |
| Rgs12                                |
| Rpl13                                |

|              |
|--------------|
| SLC9A8       |
| KCNMB1       |
| OXTR         |
| ROBO4        |
| SLCO4A1      |
| KIF23        |
| BIRC5        |
| LY6G6E       |
| CLIC1        |
| GABRA2       |
| PLSCR1       |
| PCGF1        |
| KLK9         |
| SERPINE1     |
| KLK8         |
| TELO2        |
| FHOD1        |
| CCL15        |
| CCL15-CCL14  |
| ATF3         |
| MAFK         |
| EBI3         |
| CEACAM8      |
| CCL23        |
| PLCG2        |
| MFNG         |
| DCTN3        |
| PRR5-ARHGAP8 |
| BTK          |
| RBPM2        |
| TRIM47       |
| AKR1B10      |
| LAG3         |
| ANKRD24      |
| SDC1         |
| SLC16A3      |
| CPNE2        |
| RIPK1        |
| RPL7         |
| ARHGAP8      |
| CEACAM1      |
| GFAP         |
| PHC1         |
| MICALL2      |
| CBS          |

|               |
|---------------|
| Hspb7         |
| Aldh3b1       |
| Hrk           |
| Klf9          |
| Spdef         |
| Tgfb2         |
| Ctsb          |
| Slco4a1       |
| Nlrp3         |
| Ncf2          |
| Ccl17         |
| Selpg         |
| Cyba          |
| Igfbp1        |
| Fyb           |
| Pscl          |
| Mxra8         |
| Il10ra        |
| Il21r         |
| Vav1          |
| Colla1        |
| G630025P09Rik |
| Lamb3         |
| Rnf126        |
| Itga5         |
| Maff          |
| Nes           |
| Unc93b1       |
| Prkcd         |
| Bst2          |
| Eef1d         |
| Pcgf1         |
| Kremen2       |
| Ptafr         |
| Vamp8         |
| Plekha4       |
| Bcl6b         |
| Adora3        |
| Smtn          |
| Gsdmd         |
| Hapln3        |
| Podxl         |
| Acsl6         |
| Mt2           |
| Sh3pxd2a      |

|           |
|-----------|
| TNFAIP8L2 |
| APRT      |
| TCEA2     |
| TTC7A     |

|               |
|---------------|
| Aldh1l1       |
| Ccdc50        |
| Mtx1          |
| Hck           |
| Hspb1         |
| Mt1           |
| Rftn2         |
| Purg          |
| Chaf1a        |
| Tlr12         |
| 1500015O10Rik |
| Plvap         |
| Cdca5         |
| Csflr         |
| Telo2         |
| Gtf2i         |
| Plcg2         |
| Trmt1         |
| Plau          |
| Slc6a7        |
| Ccdc102a      |
| Efemp2        |
| Trub2         |
| Oas11         |
| Tram2         |
| Syt15         |
| Arrb1         |
| Hmgn3         |
| Lgi4          |
| P2ry6         |
| Sh3tc1        |
| Gusb          |
| S100a3        |
| Tmprss4       |
| Fmod          |
| Hdac1         |
| Camk2b        |
| 0610010K14Rik |
| Cdk5rap3      |
| 4632428N05Rik |
| Sh3bp2        |
| Axl           |
| Susd3         |
| Rusc1         |
| Prss23        |

|          |
|----------|
| Immp11   |
| Sla      |
| Rnf122   |
| Ercc2    |
| Gpr84    |
| Ankrd13a |
| Senp7    |
| Prdx6    |
| F3       |
| Porcn    |
| Kcnmb1   |
| Lamc3    |
| Stat1    |
| Cebpb    |
| Zbtb16   |
| Ppl      |
| Ifitm3   |
| Ddx17    |
| Dock8    |
| Rasip1   |
| Mmp19    |
| Cbs      |
| Preli1   |
| Tlr2     |
| Rln1     |
| Lag3     |
| Git2     |
| Smad6    |
| Tnfrsf14 |
| Fhod1    |
| S100a4   |
| Sardh    |
| Col5a3   |
| Bmp1     |
| Serping1 |
| Fxyd1    |
| Gm       |
| Ifi30    |
| Ankzf1   |
| Arid4b   |
| Rras     |
| Sult1a1  |
| Cyp46a1  |
| Fus      |
| Hcrtr1   |

|               |
|---------------|
| Sdc4          |
| Proz          |
| Puf60         |
| Clu           |
| Slc1a3        |
| Il6ra         |
| Folr2         |
| Sltm          |
| Pdlim4        |
| Rbp1          |
| Kcnj11        |
| Dcun1d2       |
| Irf1          |
| Mafk          |
| Isg15         |
| Ifi35         |
| Pkig          |
| Cst7          |
| Zfp36         |
| Spata21       |
| Bcl3          |
| Arhgap25      |
| Cks2          |
| Ly86          |
| Mcm3          |
| Epha1         |
| Col5a1        |
| Rpl41         |
| 2810408A11Rik |
| Hist2h2bb     |
| Slc12a4       |
| Id3           |
| Eef1g         |
| Mxd3          |
| Stat6         |
| Ndufa3        |
| Ccdc63        |
| Dapp1         |
| Il17ra        |
| Tcea2         |
| Cmtm6         |
| Hpgd          |
| Rarg          |
| Tmem140       |
| Il1a          |

|          |
|----------|
| Ndufb4   |
| Socs1    |
| A2m      |
| Pld2     |
| Itgb8    |
| Ccnb1    |
| Zan      |
| Tspo     |
| Lfng     |
| Dusp15   |
| Gldc     |
| Ap1g2    |
| Gtf2ird1 |
| S100a6   |
| Best1    |
| Slfn2    |
| Irf8     |
| Id1      |
| Dhrs1    |
| Rps26    |
| Cebpa    |
| Ccl2     |
| F11r     |
| Pla1a    |
| Tcf3     |
| Dhx58    |
| Ripk4    |
| Man2b1   |
| Prodh    |
| Aprt     |
| Shroom3  |
| Plcb2    |
| Kif2c    |
| Gmip     |
| Baiap212 |
| Tomm20   |
| Slamf9   |
| Parp3    |
| C1ca1    |
| Socs3    |
| Tnfrsf1a |
| Ccl22    |
| Tor3a    |
| Rplp2    |
| Irf9     |

|               |
|---------------|
| Wnt8b         |
| Fxyd5         |
| Zfp69         |
| Srgn          |
| Ube2c         |
| Fcgr1         |
| Lif           |
| Atp8b1        |
| Ascl2         |
| Ii10rb        |
| Traf3ip3      |
| I830077J02Rik |
| Ctsh          |
| Uba52         |
| Klf15         |
| Tmem119       |
| Klc3          |
| Pcdh8         |
| Fcgr4         |
| Rnf138        |
| Tgfb1         |
| Ltbr          |
| Fkbp10        |
| Osgin1        |
| Tekt4         |
| Rin1          |
| Prss35        |
| Atp5l         |
| Ddx11         |
| Sbsn          |
| Mrpl54        |
| Fcgr3         |
| Ch25h         |
| Abca1         |
| Rpl9          |
| Kcne2         |
| AU015228      |
| Fgfr4         |
| Phox2a        |
| Emp3          |
| Car15         |
| Cox6a2        |
| Icam1         |
| Kif23         |
| Tubb6         |

|          |
|----------|
| Ckap21   |
| Coro1a   |
| Oasl2    |
| Cmtm3    |
| Vcp      |
| Irf3     |
| Isoc2b   |
| Pomc     |
| Crym     |
| Dennd3   |
| Hao      |
| Tagln2   |
| Cd33     |
| Ndc80    |
| Ilk      |
| Cd14     |
| Psm6     |
| Laptn5   |
| Hvcn1    |
| Kcnj8    |
| Piwil2   |
| Ston1    |
| Usp18    |
| Arhgdib  |
| Cotl1    |
| Prc1     |
| Ncan     |
| Icam2    |
| Ccl12    |
| Trib3    |
| C2       |
| Vipr1    |
| Selenbp1 |
| Cmtm7    |
| Trex1    |
| Fcer1g   |
| Pros1    |
| Gpr179   |
| Rhoc     |
| Csf3r    |
| Lrrc43   |
| Cdk10    |
| Acbd5    |
| Fmnl3    |
| Sparc    |



|               |
|---------------|
| Lcp2          |
| Gja5          |
| Gpr35         |
| Tgif1         |
| Npm3          |
| Apobec3       |
| Trib1         |
| Mrc2          |
| Fzd10         |
| Gfap          |
| Mafb          |
| Plekhf1       |
| 6430571L13Rik |
| Slc11a1       |
| Zranb3        |
| Cldn15        |
| Tgm2          |
| Ifitm7        |
| Fas           |
| Sp8           |
| Kif11         |
| Rbpjl         |
| Csf2rb        |
| Tyrobp        |
| Arrdc2        |
| 2700094K13Rik |
| Ccdc93        |
| Cirbp         |
| Cend2         |
| Ppm1j         |
| Angpt4        |
| AA467197      |
| Ecm1          |
| Pld4          |
| Lamb2         |
| Plek          |
| Mpeg1         |
| Olfm1         |
| Ripk1         |
| Rpl39         |
| Gtsel         |
| Trim14        |
| Ankrd24       |
| Top2a         |
| 1810011O10Rik |

|          |
|----------|
| Arhgap12 |
| Tatdn1   |
| Ilf3     |
| C3       |
| Slc24a4  |
| Leng8    |
| Pik3ap1  |
| Cryba4   |
| Usp2     |
| Batf2    |
| Abcg2    |
| Lsm10    |
| Stbd1    |
| Impdh2   |
| Ii18bp   |
| Plcd3    |
| Lpin3    |
| Tcn2     |
| Tspan4   |
| Acr      |
| Rab43    |
| Cln1     |
| Mrpl12   |
| Tuft1    |
| Ccnb2    |
| Mustn1   |
| Tinf2    |
| Col4a2   |
| Lama4    |
| Fkbp9    |
| Nupr1    |
| Klf13    |
| Lgals3bp |
| Cck      |
| Mrpl21   |
| Hapln2   |
| C3ar1    |
| Rpl28    |
| Fbxo39   |
| Cd9      |
| Dock2    |
| Nos3     |
| Cxcl12   |
| Calml4   |
| Rps13    |

|               |
|---------------|
| Chst3         |
| Cpne8         |
| Lrrc34        |
| Itgam         |
| 5730409E04Rik |
| Trim47        |
| Spc25         |
| Klk8          |
| Loxl2         |
| Hoxd13        |
| Ptpn6         |
| Pbxip1        |
| Serpinb8      |
| Bglap2        |
| Mark2         |
| Vasn          |
| Dmpk          |
| Emr1          |
| Mfng          |
| Tpm2          |
| Irf7          |
| Agpat2        |
| Pxmp2         |
| Fbxo17        |
| Csf2rb2       |
| Ngfr          |
| Slfn8         |
| Mboat2        |
| Klk9          |
| Tmem106a      |
| Bmp6          |
| Iqgap2        |
| Acta1         |
| Psmc3ip       |
| Myo1b         |
| Alox5         |
| Xylb          |
| Ptrf          |
| Lefty1        |
| Myd88         |
| Itgb2         |
| Lrrc52        |
| Adams18       |
| Fcgr2b        |
| Fes           |

|               |
|---------------|
| Arhgap30      |
| Rdh9          |
| Ticam2        |
| H2-K1         |
| Adamts1       |
| Stat2         |
| Zfp276        |
| Zcrb1         |
| Cftr          |
| Pofut1        |
| Ccdc84        |
| Mybpc2        |
| Pnpla7        |
| Fpgs          |
| Eya3          |
| Cldn3         |
| Sdc1          |
| Rcor3         |
| 4931429I11Rik |
| Rbpms2        |
| Rps271        |
| Aim2          |
| Rpl35         |
| Prrx2         |
| Aif1          |
| Cox5b         |
| Rcn3          |
| Cnr2          |
| Mcc           |
| Pgam5         |
| Dct           |
| Cd93          |
| Sh3bgr        |
| Abhd4         |
| Dbp           |
| 5730559C18Rik |
| Cpa2          |
| C8g           |
| Prom2         |
| Nrg4          |
| Mle1          |
| Ncf4          |
| Dmcl1         |
| Cenpa         |
| Rab25         |

|               |
|---------------|
| Cmklr1        |
| Skil          |
| Phldb2        |
| Lamc2         |
| Mvp           |
| Cyp4v3        |
| Zc3h6         |
| Tob2          |
| Oas1a         |
| Tnxb          |
| Itgal         |
| Dazl          |
| Slfn9         |
| Sbno2         |
| Dap3          |
| Ifit3         |
| 4930505A04Rik |
| Nid2          |
| Btbd16        |
| Pfdn5         |
| Gtf2e2        |
| Foxd1         |
| Mkl1          |
| Plekhf2       |
| Akr1b8        |
| Sox4          |
| Nckap11       |
| Ccne2         |
| Cend1         |
| Eme1          |
| Pi16          |
| Traf4         |
| Got111        |
| Smo           |
| Ctss          |
| H2-Ab1        |
